# Supplementary material for: Effects of Exogenous Dopamine on the Uptake, Transport, and Resorption of Apple Ionome Under Moderate Drought
Source: PubMed Central journal article supplement (PMC5996283; doi:10.3389/fpls.2018.00755), 2018-06-05
Supplement: Table_1.pdf [file Table_1.pdf]

# **Effects of exogenous dopamine on the uptake, transport, and resorption of apple ionome under moderate drought**

**Bowen Liang, Tengeng Gao, Qi Zhao, Changqing Ma, Qi Chen, Zhiwei Wei, Cuiying Li, Chao Li\*, Fengwang Ma\***

State Key Laboratory of Crop Stress Biology for Arid Areas/Shaanxi Key Laboratory of Apple, College of Horticulture, Northwest A&F University, Yangling 712100, Shaanxi, China

**\*Corresponding authors:** Chao Li, Fengwang Ma

**E-mail addresses:** lc453@163.com (C. Li), fwm64@nwsuaf.edu.cn & fwm64@sina.com (F. Ma)

**TABLE S1 | Plant length (PL), trunk diameter (TD), total fresh weight (TFW), total dry weight (TDW), and relative growth rate (RGR) of plants after 90 d under different watering and dopamine treatments.** Data are means  $\pm$ SD (n=10). An ANOVA test followed by Tukey's multiple range test was performed. Within a column, values not followed by the same letter indicate significant differences at  $P_{0.05}$  level. Significant effects of the main factors drought (DT), dopamine (DA) and the interactions (DT $\times$ DA) are also given in the table: ns, not significant; \*,  $P < 0.05$ ; \*\*,  $P < 0.01$ ; and \*\*\*,  $P < 0.001$ . Treatments: WW, irrigated daily to maintain 75-85% field capacity; DS, irrigated daily to maintain 45-55% field capacity; WW+DA, irrigated daily to maintain 75-85% field capacity plus 100  $\mu$ M dopamine; and DS+DA, irrigated daily to maintain 45-55% field capacity plus 100  $\mu$ M dopamine.

| Treatment               | PL<br>(cm)         | TD<br>(mm)        | TFW<br>(g plant <sup>-1</sup> ) | TDW<br>(g plant <sup>-1</sup> ) | RGR<br>(g kg <sup>-1</sup> d <sup>-1</sup> ) |
|-------------------------|--------------------|-------------------|---------------------------------|---------------------------------|----------------------------------------------|
| WW                      | 143.28 $\pm$ 4.57a | 10.45 $\pm$ 0.31a | 264.69 $\pm$ 7.18a              | 105.30 $\pm$ 4.91a              | 13.91 $\pm$ 0.52a                            |
| DS                      | 93.16 $\pm$ 5.27c  | 7.28 $\pm$ 0.28c  | 116.70 $\pm$ 5.62c              | 54.35 $\pm$ 3.73c               | 6.55 $\pm$ 0.76c                             |
| WW+DA                   | 144.88 $\pm$ 4.20a | 10.54 $\pm$ 0.28a | 270.49 $\pm$ 4.93a              | 109.91 $\pm$ 5.24a              | 14.38 $\pm$ 0.54a                            |
| DS+DA                   | 107.40 $\pm$ 5.41b | 7.84 $\pm$ 0.41b  | 158.96 $\pm$ 5.16b              | 74.20 $\pm$ 2.95b               | 10.02 $\pm$ 0.43b                            |
| Significance of effects |                    |                   |                                 |                                 |                                              |
| DT                      | ***                | ***               | ***                             | ***                             | ***                                          |
| DA                      | ***                | ***               | ***                             | ***                             | ***                                          |
| DT $\times$ DA          | ***                | ***               | ***                             | ***                             | ***                                          |

**TABLE S2 | Root mass fraction (RMF), stem mass fraction (SMF), leaf mass fraction (LMF), root stem ratio (RSR), relative water content (RWC), and H<sub>2</sub>O<sub>2</sub> content of plants grown for 90 d under different watering and dopamine treatments.** Data are means  $\pm$  SD (n=10). An ANOVA test followed by Tukey's multiple range test was performed. Within a column, values not followed by the same letter indicate significant differences at  $P_{0.05}$  level. Significant effects of the main factors drought (DT), dopamine (DA) and the interactions (DT $\times$ DA) are also given in the table: ns, not significant; \*,  $P < 0.05$ ; \*\*,  $P < 0.01$ ; and \*\*\*,  $P < 0.001$ . Treatments: WW, irrigated daily to maintain 75-85% field capacity; DS, irrigated daily to maintain 45-55% field capacity; WW+DA, irrigated daily to maintain 75-85% field capacity plus 100  $\mu$ M dopamine; and DS+DA, irrigated daily to maintain 45-55% field capacity plus 100  $\mu$ M dopamine.

| Treatment               | RMF<br>(%)        | SMF<br>(%)        | LMF<br>(%)         | RSR              | RWC<br>(%)        | H <sub>2</sub> O <sub>2</sub><br>( $\mu$ mol g <sup>-1</sup> FW) |
|-------------------------|-------------------|-------------------|--------------------|------------------|-------------------|------------------------------------------------------------------|
| WW                      | 50.39 $\pm$ 2.35b | 30.99 $\pm$ 1.97a | 18.62 $\pm$ 1.19a  | 1.64 $\pm$ 0.17b | 91.33 $\pm$ 0.18a | 1.17 $\pm$ 0.11c                                                 |
| DS                      | 57.83 $\pm$ 3.18a | 22.61 $\pm$ 1.98b | 19.56 $\pm$ 1.73a  | 2.59 $\pm$ 0.36a | 86.62 $\pm$ 0.21c | 2.61 $\pm$ 0.09a                                                 |
| WW+DA                   | 51.51 $\pm$ 2.15b | 30.30 $\pm$ 1.59a | 18.20 $\pm$ 1.06ab | 1.71 $\pm$ 0.15b | 91.45 $\pm$ 0.12a | 1.07 $\pm$ 0.07c                                                 |
| DS+DA                   | 59.73 $\pm$ 2.07a | 23.48 $\pm$ 1.54b | 16.79 $\pm$ 0.97b  | 2.56 $\pm$ 0.26a | 88.91 $\pm$ 0.41b | 1.78 $\pm$ 0.08b                                                 |
| Significance of effects |                   |                   |                    |                  |                   |                                                                  |
| DT                      | ***               | ***               | ns                 | ***              | ***               | ***                                                              |
| DA                      | ns                | ns                | ***                | ns               | ***               | ***                                                              |
| DT $\times$ DA          | ns                | ns                | **                 | ns               | ***               | ***                                                              |

**TABLE S3 | Concentration of nutritional elements in leaf dry matter from plants grown for 90 d under different watering and dopamine treatments.** Data are means  $\pm$  SD (n=5). Unit of measure: mg g<sup>-1</sup> DW for N, P, K, Ca, Mg, and S;  $\mu$ g g<sup>-1</sup> DW for Fe, Mn, Cu, Zn, B, Al, Cr, Ni, As, Mo, Pb, and Cd. An ANOVA test followed by Tukey's multiple range test was performed. Within a row, values not followed by the same letter indicate significant differences at  $P_{0.05}$  level. Significant effects of the main factors drought (DT), dopamine (DA) and the interactions (DT $\times$ DA) are also given in the table: ns, not significant; \*,  $P < 0.05$ ; \*\*,  $P < 0.01$ ; and \*\*\*,  $P < 0.001$ . Treatments: WW, irrigated daily to maintain 75-85% field capacity; DS, irrigated daily to maintain 45-55% field capacity; WW+DA, irrigated daily to maintain 75-85% field capacity plus 100  $\mu$ M dopamine; and DS+DA, irrigated daily to maintain 45-55% field capacity plus 100  $\mu$ M dopamine.

| Element | WW                 | DS                | WW+DA             | DS+DA              | Significances |     |                |
|---------|--------------------|-------------------|-------------------|--------------------|---------------|-----|----------------|
|         |                    |                   |                   |                    | DT            | DA  | DT $\times$ DA |
| N       | 25.22 $\pm$ 0.18b  | 23.03 $\pm$ 0.13d | 25.69 $\pm$ 0.15a | 23.98 $\pm$ 0.17c  | ***           | *** | **             |
| P       | 1.78 $\pm$ 0.04b   | 1.01 $\pm$ 0.06d  | 2.25 $\pm$ 0.05a  | 1.19 $\pm$ 0.03c   | ***           | *** | ***            |
| K       | 17.00 $\pm$ 0.19ab | 15.25 $\pm$ 0.42c | 17.22 $\pm$ 0.46a | 16.49 $\pm$ 0.25b  | ***           | *** | **             |
| Ca      | 16.24 $\pm$ 0.42b  | 22.28 $\pm$ 1.15a | 16.61 $\pm$ 0.50b | 17.42 $\pm$ 0.47b  | ***           | *** | ***            |
| Mg      | 4.03 $\pm$ 0.19b   | 4.96 $\pm$ 0.57a  | 3.88 $\pm$ 0.32b  | 4.03 $\pm$ 0.23b   | **            | **  | *              |
| S       | 1.48 $\pm$ 0.06a   | 1.40 $\pm$ 0.05ab | 1.45 $\pm$ 0.05a  | 1.23 $\pm$ 0.16b   | **            | *   | ns             |
| Fe      | 79.36 $\pm$ 6.46a  | 80.45 $\pm$ 3.35a | 67.26 $\pm$ 1.27b | 71.07 $\pm$ 6.97ab | ns            | *** | ns             |
| Mn      | 36.55 $\pm$ 0.34ab | 40.67 $\pm$ 2.79a | 32.99 $\pm$ 1.33b | 35.46 $\pm$ 3.35b  | **            | *** | ns             |
| Cu      | 5.31 $\pm$ 0.23a   | 2.83 $\pm$ 0.30c  | 5.63 $\pm$ 0.29a  | 3.35 $\pm$ 0.24b   | ***           | **  | ns             |
| Zn      | 34.00 $\pm$ 4.30a  | 28.19 $\pm$ 2.62a | 29.53 $\pm$ 1.24a | 32.80 $\pm$ 3.43a  | ns            | ns  | **             |
| B       | 43.24 $\pm$ 0.73a  | 33.96 $\pm$ 1.49b | 43.85 $\pm$ 2.40a | 33.13 $\pm$ 1.11b  | ***           | ns  | ns             |
| Al      | 53.71 $\pm$ 4.88a  | 52.43 $\pm$ 4.05a | 40.12 $\pm$ 4.61b | 39.60 $\pm$ 3.93b  | ns            | *** | ns             |
| Cr      | 0.37 $\pm$ 0.05a   | 0.40 $\pm$ 0.07a  | 0.32 $\pm$ 0.04a  | 0.30 $\pm$ 0.05a   | ns            | **  | ns             |
| Ni      | 0.84 $\pm$ 0.11ab  | 0.98 $\pm$ 0.03a  | 0.78 $\pm$ 0.13b  | 0.91 $\pm$ 0.08ab  | **            | ns  | ns             |
| As      | 1.19 $\pm$ 0.08a   | 0.99 $\pm$ 0.08bc | 1.07 $\pm$ 0.03ab | 0.86 $\pm$ 0.15c   | ***           | *   | ns             |
| Mo      | 1.13 $\pm$ 0.06b   | 0.63 $\pm$ 0.03c  | 1.36 $\pm$ 0.08a  | 0.72 $\pm$ 0.08c   | ***           | *** | *              |
| Pb      | 0.43 $\pm$ 0.04ab  | 0.40 $\pm$ 0.01b  | 0.37 $\pm$ 0.02b  | 0.48 $\pm$ 0.05a   | *             | ns  | ***            |
| Cd      | 27.79 $\pm$ 4.51a  | 31.24 $\pm$ 1.84a | 27.66 $\pm$ 1.65a | 25.84 $\pm$ 3.56a  | ns            | ns  | ns             |

**TABLE S4 | Concentration of nutritional elements in stem dry matter from plants grown for 90 d under different watering and dopamine treatments.** Data are means  $\pm$  SD (n=5). Unit of measure: mg g<sup>-1</sup> DW for N, P, K, Ca, Mg, and S;  $\mu$ g g<sup>-1</sup> DW for Fe, Mn, Cu, Zn, B, Al, Cr, Ni, As, Mo, Pb, and Cd. An ANOVA test followed by Tukey's multiple range test was performed. Within a row, values not followed by the same letter indicate significant differences at  $P_{0.05}$  level. Significant effects of the main factors drought (DT), dopamine (DA) and the interactions (DT $\times$ DA) are also given in the table: ns, not significant; \*,  $P < 0.05$ ; \*\*,  $P < 0.01$ ; and \*\*\*,  $P < 0.001$ . Treatments: WW, irrigated daily to maintain 75-85% field capacity; DS, irrigated daily to maintain 45-55% field capacity; WW+DA, irrigated daily to maintain 75-85% field capacity plus 100  $\mu$ M dopamine; and DS+DA, irrigated daily to maintain 45-55% field capacity plus 100  $\mu$ M dopamine.

| Element | WW                 | DS                | WW+DA              | DS+DA             | Significances |     |                |
|---------|--------------------|-------------------|--------------------|-------------------|---------------|-----|----------------|
|         |                    |                   |                    |                   | DT            | DA  | DT $\times$ DA |
| N       | 12.05 $\pm$ 0.12b  | 13.62 $\pm$ 0.36a | 12.03 $\pm$ 0.13b  | 13.95 $\pm$ 0.44a | ***           | ns  | ns             |
| P       | 1.06 $\pm$ 0.05b   | 0.92 $\pm$ 0.07c  | 1.24 $\pm$ 0.08a   | 1.19 $\pm$ 0.07a  | **            | *** | ns             |
| K       | 5.75 $\pm$ 0.17bc  | 6.07 $\pm$ 0.34ab | 5.45 $\pm$ 0.15c   | 6.21 $\pm$ 0.11a  | ***           | ns  | *              |
| Ca      | 6.29 $\pm$ 0.56c   | 10.00 $\pm$ 0.82a | 6.12 $\pm$ 0.12c   | 7.70 $\pm$ 0.60b  | ***           | *** | **             |
| Mg      | 1.35 $\pm$ 0.09ab  | 1.48 $\pm$ 0.05a  | 1.30 $\pm$ 0.06b   | 1.26 $\pm$ 0.09b  | ns            | **  | *              |
| S       | 0.39 $\pm$ 0.04bc  | 0.62 $\pm$ 0.02a  | 0.36 $\pm$ 0.02c   | 0.44 $\pm$ 0.02b  | ***           | *** | ***            |
| Fe      | 14.94 $\pm$ 0.32ab | 15.28 $\pm$ 1.00a | 12.76 $\pm$ 1.43bc | 11.01 $\pm$ 1.10c | ns            | *** | ns             |
| Mn      | 11.99 $\pm$ 0.65a  | 8.36 $\pm$ 0.44b  | 11.89 $\pm$ 0.85a  | 8.11 $\pm$ 0.67b  | ***           | ns  | ns             |
| Cu      | 3.97 $\pm$ 0.46ab  | 3.25 $\pm$ 0.33c  | 4.57 $\pm$ 0.44a   | 3.54 $\pm$ 0.26bc | ***           | *   | ns             |
| Zn      | 9.74 $\pm$ 0.43b   | 10.24 $\pm$ 0.75b | 9.43 $\pm$ 0.85b   | 14.15 $\pm$ 0.47a | ***           | *** | ***            |
| B       | 60.90 $\pm$ 0.45a  | 48.03 $\pm$ 2.76b | 60.14 $\pm$ 1.23a  | 45.90 $\pm$ 4.31b | ***           | ns  | ns             |
| Al      | 5.47 $\pm$ 0.31a   | 4.59 $\pm$ 0.31b  | 4.30 $\pm$ 0.61b   | 5.39 $\pm$ 0.45a  | ns            | ns  | ***            |
| Cr      | 0.19 $\pm$ 0.01a   | 0.12 $\pm$ 0.02b  | 0.10 $\pm$ 0.01b   | 0.10 $\pm$ 0.01b  | ***           | *** | ***            |
| Ni      | 1.80 $\pm$ 0.31a   | 0.94 $\pm$ 0.10b  | 0.43 $\pm$ 0.10c   | 0.76 $\pm$ 0.11bc | **            | *** | ***            |
| As      | 0.16 $\pm$ 0.02a   | 0.14 $\pm$ 0.01ab | 0.13 $\pm$ 0.02ab  | 0.12 $\pm$ 0.02b  | *             | *   | ns             |
| Mo      | 0.47 $\pm$ 0.03a   | 0.27 $\pm$ 0.01b  | 0.50 $\pm$ 0.02a   | 0.30 $\pm$ 0.03b  | ***           | **  | ns             |
| Pb      | 0.12 $\pm$ 0.02a   | 0.14 $\pm$ 0.03a  | 0.05 $\pm$ 0.01b   | 0.05 $\pm$ 0.01b  | ns            | *** | ns             |
| Cd      | 15.60 $\pm$ 1.75ab | 19.81 $\pm$ 2.95a | 10.53 $\pm$ 2.86c  | 15.35 $\pm$ 1.56b | ***           | *** | ns             |

**TABLE S5 | Concentration of nutritional elements in root dry matter from plants grown for 90 d under different watering and dopamine treatments.** Data are means  $\pm$  SD (n=5). Unit of measure: mg g<sup>-1</sup> DW for N, P, K, Ca, Mg, and S;  $\mu$ g g<sup>-1</sup> DW for Fe, Mn, Cu, Zn, B, Al, Cr, Ni, As, Mo, Pb, and Cd. An ANOVA test followed by Tukey's multiple range test was performed. Within a row, values not followed by the same letter indicate significant differences at  $P_{0.05}$  level. Significant effects of the main factors drought (DT), dopamine (DA) and the interactions (DT $\times$ DA) are also given in the table: ns, not significant; \*,  $P < 0.05$ ; \*\*,  $P < 0.01$ ; and \*\*\*,  $P < 0.001$ . Treatments: WW, irrigated daily to maintain 75-85% field capacity; DS, irrigated daily to maintain 45-55% field capacity; WW+DA, irrigated daily to maintain 75-85% field capacity plus 100  $\mu$ M dopamine; and DS+DA, irrigated daily to maintain 45-55% field capacity plus 100  $\mu$ M dopamine.

| Element | WW                  | DS                   | WW+DA               | DS+DA                | Significances |     |                |
|---------|---------------------|----------------------|---------------------|----------------------|---------------|-----|----------------|
|         |                     |                      |                     |                      | DT            | DA  | DT $\times$ DA |
| N       | 8.59 $\pm$ 0.18d    | 15.98 $\pm$ 0.25a    | 10.48 $\pm$ 0.43c   | 15.40 $\pm$ 0.29b    | ***           | *** | ***            |
| P       | 1.10 $\pm$ 0.06b    | 0.88 $\pm$ 0.10c     | 1.27 $\pm$ 0.04a    | 1.04 $\pm$ 0.08b     | ***           | *** | ns             |
| K       | 4.58 $\pm$ 0.10b    | 4.35 $\pm$ 0.48c     | 5.42 $\pm$ 0.11a    | 3.97 $\pm$ 0.10bc    | ***           | ns  | ***            |
| Ca      | 7.88 $\pm$ 0.18ab   | 8.71 $\pm$ 0.75a     | 7.48 $\pm$ 0.35b    | 5.93 $\pm$ 0.50c     | ns            | *** | ***            |
| Mg      | 1.48 $\pm$ 0.11b    | 1.98 $\pm$ 0.26a     | 1.47 $\pm$ 0.06b    | 1.16 $\pm$ 0.04c     | ns            | *** | ***            |
| S       | 0.65 $\pm$ 0.05b    | 1.08 $\pm$ 0.19a     | 0.90 $\pm$ 0.06a    | 0.65 $\pm$ 0.04b     | ns            | ns  | ***            |
| Fe      | 325.72 $\pm$ 22.75c | 628.89 $\pm$ 105.87a | 478.17 $\pm$ 65.33b | 418.93 $\pm$ 56.29bc | **            | ns  | ***            |
| Mn      | 15.50 $\pm$ 1.28b   | 25.85 $\pm$ 5.83a    | 18.09 $\pm$ 2.11b   | 13.62 $\pm$ 0.95b    | ns            | **  | ***            |
| Cu      | 7.52 $\pm$ 0.38b    | 8.29 $\pm$ 0.36ab    | 8.74 $\pm$ 0.47a    | 5.73 $\pm$ 0.59c     | ***           | **  | ***            |
| Zn      | 13.39 $\pm$ 1.75a   | 9.43 $\pm$ 0.94b     | 14.90 $\pm$ 0.67a   | 6.70 $\pm$ 0.90c     | ***           | ns  | **             |
| B       | 60.90 $\pm$ 0.45a   | 48.03 $\pm$ 2.76b    | 60.14 $\pm$ 1.23a   | 45.90 $\pm$ 4.31b    | ***           | ns  | ***            |
| Al      | 437.25 $\pm$ 80.71b | 693.27 $\pm$ 107.57a | 510.65 $\pm$ 57.69b | 456.59 $\pm$ 73.64b  | *             | ns  | **             |
| Cr      | 2.35 $\pm$ 0.32b    | 3.72 $\pm$ 0.75a     | 3.27 $\pm$ 0.36a    | 2.96 $\pm$ 0.19ab    | *             | ns  | **             |
| Ni      | 2.99 $\pm$ 0.50a    | 3.27 $\pm$ 1.16a     | 3.24 $\pm$ 0.94a    | 2.25 $\pm$ 0.43a     | ns            | ns  | ns             |
| As      | 0.84 $\pm$ 0.08a    | 0.96 $\pm$ 0.11a     | 0.84 $\pm$ 0.18a    | 0.49 $\pm$ 0.05b     | *             | *** | ***            |
| Mo      | 1.05 $\pm$ 0.14b    | 2.33 $\pm$ 0.46a     | 1.44 $\pm$ 0.04b    | 1.12 $\pm$ 0.10b     | ***           | **  | ***            |
| Pb      | 0.46 $\pm$ 0.03c    | 0.85 $\pm$ 0.13a     | 0.65 $\pm$ 0.03b    | 0.57 $\pm$ 0.07bc    | ***           | ns  | ***            |
| Cd      | 72.39 $\pm$ 6.66b   | 159.46 $\pm$ 23.08a  | 87.31 $\pm$ 13.54b  | 71.12 $\pm$ 7.27b    | ***           | *** | ***            |

**TABLE S6 | Uptake fluxes of nutritional elements in plants after 90 d of growth under different watering and dopamine treatments.** Data are means  $\pm$ SD (n=5). Unit of measure: mg plant<sup>-1</sup> day<sup>-1</sup> for N, P, K, Ca, Mg, and S;  $\mu$ g plant<sup>-1</sup> day<sup>-1</sup> for Fe, Mn, Cu, Zn, B, Al, Cr, Ni, As, Mo, Pb, and Cd. An ANOVA test followed by Tukey's multiple range test was performed. Within a row, values not followed by the same letter indicate significant differences at  $P_{0.05}$  level. Significant effects of the main factors drought (DT), dopamine (DA) and the interactions (DT $\times$ DA) are also given in the table: ns, not significant; \*,  $P < 0.05$ ; \*\*,  $P < 0.01$ ; and \*\*\*,  $P < 0.001$ . Treatments: WW, irrigated daily to maintain 75-85% field capacity; DS, irrigated daily to maintain 45-55% field capacity; WW+DA, irrigated daily to maintain 75-85% field capacity plus 100  $\mu$ M dopamine; and DS+DA, irrigated daily to maintain 45-55% field capacity plus 100  $\mu$ M dopamine.

| Element | WW                  | DS                  | WW+DA               | DS+DA               | Significances |     |                |
|---------|---------------------|---------------------|---------------------|---------------------|---------------|-----|----------------|
|         |                     |                     |                     |                     | DT            | DA  | DT $\times$ DA |
| N       | 18.68 $\pm$ 0.09b   | 5.99 $\pm$ 0.04d    | 21.68 $\pm$ 0.33a   | 12.27 $\pm$ 0.12c   | ***           | *** | ***            |
| P       | 1.78 $\pm$ 0.07b    | 0.33 $\pm$ 0.03d    | 2.27 $\pm$ 0.06a    | 0.82 $\pm$ 0.05c    | ***           | *** | ns             |
| K       | 10.62 $\pm$ 0.08b   | 2.44 $\pm$ 0.12d    | 11.97 $\pm$ 0.21a   | 4.90 $\pm$ 0.08c    | ***           | *** | ***            |
| Ca      | 13.10 $\pm$ 0.40b   | 4.14 $\pm$ 0.16d    | 13.79 $\pm$ 0.29a   | 6.15 $\pm$ 0.16c    | ***           | *** | ***            |
| Mg      | 2.80 $\pm$ 0.09a    | 0.87 $\pm$ 0.05c    | 2.94 $\pm$ 0.12a    | 1.24 $\pm$ 0.03b    | ***           | *** | **             |
| S       | 1.06 $\pm$ 0.06b    | 0.37 $\pm$ 0.04d    | 1.32 $\pm$ 0.04a    | 0.52 $\pm$ 0.01c    | ***           | *** | *              |
| Fe      | 268.93 $\pm$ 16.42b | 136.54 $\pm$ 21.98d | 415.10 $\pm$ 52.83a | 197.00 $\pm$ 25.12c | ***           | *** | **             |
| Mn      | 26.84 $\pm$ 0.70b   | 8.83 $\pm$ 1.28d    | 29.91 $\pm$ 1.50a   | 11.89 $\pm$ 0.28c   | ***           | *** | ns             |
| Cu      | 8.80 $\pm$ 0.33b    | 2.17 $\pm$ 0.07d    | 10.93 $\pm$ 0.54a   | 3.58 $\pm$ 0.26c    | ***           | *** | *              |
| Zn      | 23.57 $\pm$ 1.37a   | 4.72 $\pm$ 0.25c    | 25.14 $\pm$ 0.80a   | 9.53 $\pm$ 0.67b    | ***           | *** | **             |
| B       | 79.04 $\pm$ 1.70b   | 17.49 $\pm$ 1.50d   | 92.52 $\pm$ 1.78a   | 33.55 $\pm$ 1.39c   | ***           | *** | ns             |
| Al      | 340.00 $\pm$ 58.75b | 147.02 $\pm$ 22.44c | 429.72 $\pm$ 48.56a | 208.84 $\pm$ 32.35c | ***           | **  | ns             |
| Cr      | 1.93 $\pm$ 0.25b    | 0.80 $\pm$ 0.16d    | 2.81 $\pm$ 0.29a    | 1.37 $\pm$ 0.08c    | ***           | *** | ns             |
| Ni      | 3.25 $\pm$ 0.42a    | 0.82 $\pm$ 0.25b    | 3.08 $\pm$ 0.80a    | 1.25 $\pm$ 0.21b    | ***           | ns  | ns             |
| As      | 1.02 $\pm$ 0.05a    | 0.28 $\pm$ 0.02b    | 1.06 $\pm$ 0.15a    | 0.35 $\pm$ 0.02b    | ***           | ns  | ns             |
| Mo      | 1.30 $\pm$ 0.10b    | 0.55 $\pm$ 0.10c    | 1.80 $\pm$ 0.04a    | 0.64 $\pm$ 0.04c    | ***           | *** | ***            |
| Pb      | 0.51 $\pm$ 0.03b    | 0.22 $\pm$ 0.03d    | 0.66 $\pm$ 0.03a    | 0.32 $\pm$ 0.03c    | ***           | *** | ns             |
| Cd      | 68.10 $\pm$ 5.04b   | 36.65 $\pm$ 4.52c   | 84.13 $\pm$ 10.42a  | 37.51 $\pm$ 3.05c   | ***           | **  | *              |

**TABLE S7 | Transport of nutritional elements to leaves of plants grown for 90 d under different watering and dopamine treatments.** Data are means  $\pm$ SD (n=5). Unit of measure:  $\mu\text{g plant}^{-1} \text{ day}^{-1}$  for N, P, K, Ca, Mg, and S;  $\text{ng plant}^{-1} \text{ day}^{-1}$  for Fe, Mn, Cu, Zn, B, Al, Cr, Ni, As, Mo, Pb, and Cd. An ANOVA test followed by Tukey's multiple range test was performed. Within a row, values not followed by the same letter indicate significant differences at  $P_{0.05}$  level. Significant effects of the main factors drought (DT), dopamine (DA) and the interactions (DT $\times$ DA) are also given in the table: ns, not significant; \*,  $P < 0.05$ ; \*\*,  $P < 0.01$ ; and \*\*\*,  $P < 0.001$ . Treatments: WW, irrigated daily to maintain 75-85% field capacity; DS, irrigated daily to maintain 45-55% field capacity; WW+DA, irrigated daily to maintain 75-85% field capacity plus 100  $\mu\text{M}$  dopamine; and DS+DA, irrigated daily to maintain 45-55% field capacity plus 100  $\mu\text{M}$  dopamine.

| Element | WW                  | DS                 | WW+DA               | DS+DA               | Significances |     |                |
|---------|---------------------|--------------------|---------------------|---------------------|---------------|-----|----------------|
|         |                     |                    |                     |                     | DT            | DA  | DT $\times$ DA |
| N       | 104.61 $\pm$ 1.18a  | 27.09 $\pm$ 0.62c  | 106.87 $\pm$ 0.97a  | 42.70 $\pm$ 0.79b   | ***           | *** | ***            |
| P       | 7.54 $\pm$ 0.23b    | -0.89 $\pm$ 0.30d  | 10.52 $\pm$ 0.30a   | 0.84 $\pm$ 0.15c    | ***           | *** | ***            |
| K       | 83.20 $\pm$ 1.28a   | 33.96 $\pm$ 2.03c  | 83.62 $\pm$ 2.96a   | 44.36 $\pm$ 1.17b   | ***           | *** | ***            |
| Ca      | 72.85 $\pm$ 1.69a   | 61.88 $\pm$ 1.34b  | 72.38 $\pm$ 0.60a   | 42.69 $\pm$ 0.90c   | ***           | *** | ***            |
| Mg      | 17.63 $\pm$ 0.36a   | 11.79 $\pm$ 2.05b  | 17.64 $\pm$ 1.25a   | 8.27 $\pm$ 0.33c    | ***           | *   | *              |
| S       | 6.31 $\pm$ 0.29a    | 2.27 $\pm$ 0.12b   | 5.93 $\pm$ 0.08a    | 2.37 $\pm$ 0.47b    | ***           | ns  | ns             |
| Fe      | 374.47 $\pm$ 19.87a | 147.36 $\pm$ 7.02c | 260.81 $\pm$ 6.09b  | 140.15 $\pm$ 4.11c  | ***           | *** | ***            |
| Mn      | 185.07 $\pm$ 1.69a  | 129.01 $\pm$ 3.94c | 163.17 $\pm$ 6.43b  | 101.91 $\pm$ 11.14d | ***           | *** | ns             |
| Cu      | 28.79 $\pm$ 0.35a   | 5.29 $\pm$ 0.69c   | 29.71 $\pm$ 1.17a   | 7.95 $\pm$ 0.18b    | ***           | **  | ns             |
| Zn      | 214.98 $\pm$ 0.12a  | 107.32 $\pm$ 3.14d | 175.91 $\pm$ 3.59b  | 141.62 $\pm$ 5.71c  | ***           | ns  | ***            |
| B       | 190.35 $\pm$ 1.85b  | 38.38 $\pm$ 1.51d  | 201.01 $\pm$ 6.16a  | 50.66 $\pm$ 2.23c   | ***           | *** | ns             |
| Al      | 215.12 $\pm$ 2.65a  | 79.43 $\pm$ 7.41c  | 132.12 $\pm$ 14.58b | 51.19 $\pm$ 12.61d  | ***           | *** | **             |
| Cr      | -0.51 $\pm$ 0.08a   | -1.99 $\pm$ 0.10c  | -0.46 $\pm$ 0.12a   | -1.64 $\pm$ 0.16b   | ***           | *   | ns             |
| Ni      | 2.37 $\pm$ 0.46a    | 0.40 $\pm$ 0.08b   | 2.36 $\pm$ 0.44a    | 0.92 $\pm$ 0.25b    | ***           | ns  | ns             |
| As      | 6.67 $\pm$ 0.17a    | 3.45 $\pm$ 0.09c   | 5.72 $\pm$ 0.09b    | 3.17 $\pm$ 0.16c    | ***           | *** | **             |
| Mo      | 5.37 $\pm$ 0.20b    | -0.23 $\pm$ 0.08d  | 6.30 $\pm$ 0.22a    | 0.96 $\pm$ 0.06c    | ***           | *** | ns             |
| Pb      | 2.64 $\pm$ 0.09a    | 1.38 $\pm$ 0.04c   | 1.95 $\pm$ 0.11b    | 1.79 $\pm$ 0.17b    | ***           | ns  | ***            |
| Cd      | 167.62 $\pm$ 10.13a | 97.71 $\pm$ 3.44c  | 139.48 $\pm$ 8.39b  | 68.29 $\pm$ 10.67d  | ***           | *** | ns             |



**TABLE S8 | Transport of nutritional elements to stems of plants grown for 90 d under different watering and dopamine treatments.** Data are means  $\pm$ SD (n=5). Unit of measure:  $\mu\text{g plant}^{-1} \text{ day}^{-1}$  for N, P, K, Ca, Mg, and S;  $\text{ng plant}^{-1} \text{ day}^{-1}$  for Fe, Mn, Cu, Zn, B, Al, Cr, Ni, As, Mo, Pb, and Cd. An ANOVA test followed by Tukey's multiple range test was performed. Within a row, values not followed by the same letter indicate significant differences at  $P_{0.05}$  level. Significant effects of the main factors drought (DT), dopamine (DA) and the interactions (DT $\times$ DA) are also given in the table: ns, not significant; \*,  $P < 0.05$ ; \*\*,  $P < 0.01$ ; and \*\*\*,  $P < 0.001$ . Treatments: WW, irrigated daily to maintain 75-85% field capacity; DS, irrigated daily to maintain 45-55% field capacity; WW+DA, irrigated daily to maintain 75-85% field capacity plus 100  $\mu\text{M}$  dopamine; and DS+DA, irrigated daily to maintain 45-55% field capacity plus 100  $\mu\text{M}$  dopamine.

| Element | WW                 | DS                 | WW+DA               | DS+DA               | Significances |     |                |
|---------|--------------------|--------------------|---------------------|---------------------|---------------|-----|----------------|
|         |                    |                    |                     |                     | DT            | DA  | DT $\times$ DA |
| N       | 109.73 $\pm$ 1.27a | 44.77 $\pm$ 2.02c  | 108.04 $\pm$ 1.32a  | 65.49 $\pm$ 2.84b   | ***           | *** | ***            |
| P       | 9.86 $\pm$ 0.57b   | 2.63 $\pm$ 0.38d   | 11.59 $\pm$ 0.91a   | 5.73 $\pm$ 0.46c    | ***           | *** | *              |
| K       | 52.80 $\pm$ 1.83a  | 19.57 $\pm$ 1.90d  | 48.86 $\pm$ 1.57b   | 28.82 $\pm$ 0.71c   | ***           | **  | ***            |
| Ca      | 53.16 $\pm$ 3.27a  | 34.50 $\pm$ 3.65b  | 51.55 $\pm$ 1.03a   | 32.79 $\pm$ 3.27b   | ***           | ns  | ns             |
| Mg      | 11.67 $\pm$ 0.39a  | 4.24 $\pm$ 0.19c   | 11.54 $\pm$ 0.38a   | 5.38 $\pm$ 0.35b    | ***           | *   | *              |
| S       | 3.57 $\pm$ 0.29a   | 2.39 $\pm$ 0.05b   | 3.15 $\pm$ 0.14a    | 1.97 $\pm$ 0.09b    | ***           | **  | ns             |
| Fe      | 46.03 $\pm$ 3.13a  | -77.81 $\pm$ 2.59c | 28.43 $\pm$ 12.04b  | -61.61 $\pm$ 2.68c  | ***           | ns  | **             |
| Mn      | 112.27 $\pm$ 0.75a | 27.01 $\pm$ 1.07c  | 110.90 $\pm$ 7.14a  | 37.55 $\pm$ 2.05b   | ***           | ns  | *              |
| Cu      | 38.19 $\pm$ 4.35b  | 9.46 $\pm$ 0.40d   | 46.15 $\pm$ 3.25a   | 17.02 $\pm$ 0.77c   | ***           | **  | ns             |
| Zn      | 92.65 $\pm$ 1.05a  | 32.45 $\pm$ 1.05c  | 90.23 $\pm$ 6.03a   | 74.08 $\pm$ 1.88b   | ***           | *** | ***            |
| B       | 621.12 $\pm$ 1.36a | 194.86 $\pm$ 5.91d | 595.22 $\pm$ 12.95b | 259.95 $\pm$ 12.21c | ***           | **  | ***            |
| Al      | 36.10 $\pm$ 2.45a  | -6.14 $\pm$ 0.76d  | 20.04 $\pm$ 3.40b   | 7.86 $\pm$ 0.29c    | ***           | ns  | ***            |
| Cr      | 0.69 $\pm$ 0.03a   | -1.25 $\pm$ 0.03d  | -0.38 $\pm$ 0.11b   | -0.94 $\pm$ 0.05c   | ***           | *** | ***            |
| Ni      | -0.97 $\pm$ 0.58a  | -20.07 $\pm$ 0.27d | -13.91 $\pm$ 0.63b  | -15.54 $\pm$ 0.37c  | ***           | *** | ***            |
| As      | 1.56 $\pm$ 0.08a   | 0.49 $\pm$ 0.01b   | 1.31 $\pm$ 0.20a    | 0.53 $\pm$ 0.02b    | ***           | ns  | *              |
| Mo      | 4.46 $\pm$ 0.13a   | 0.60 $\pm$ 0.01c   | 4.72 $\pm$ 0.25a    | 1.36 $\pm$ 0.11b    | ***           | *** | *              |
| Pb      | 1.03 $\pm$ 0.10a   | 0.34 $\pm$ 0.09b   | 0.25 $\pm$ 0.05b    | -0.08 $\pm$ 0.07c   | ***           | *** | **             |
| Cd      | 111.87 $\pm$ 9.80a | 25.23 $\pm$ 5.03c  | 68.21 $\pm$ 7.21b   | 26.74 $\pm$ 5.98c   | ***           | *** | ***            |

**TABLE S9 | Accumulation of nutritional elements in roots of plants grown for 90 d under different watering and dopamine treatments.** Data are means  $\pm$  SD (n=5). Unit of measure:  $\mu\text{g plant}^{-1} \text{ day}^{-1}$  for N, P, K, Ca, Mg, and S;  $\text{ng plant}^{-1} \text{ day}^{-1}$  for Fe, Mn, Cu, Zn, B, Al, Cr, Ni, As, Mo, Pb, and Cd. An ANOVA test followed by Tukey's multiple range test was performed. Within a row, values not followed by the same letter indicate significant differences at  $P_{0.05}$  level. Significant effects of the main factors drought (DT), dopamine (DA) and the interactions (DT $\times$ DA) are also given in the table: ns, not significant; \*,  $P < 0.05$ ; \*\*,  $P < 0.01$ ; and \*\*\*,  $P < 0.001$ . Treatments: WW, irrigated daily to maintain 75-85% field capacity; DS, irrigated daily to maintain 45-55% field capacity; WW+DA, irrigated daily to maintain 75-85% field capacity plus 100  $\mu\text{M}$  dopamine; and DS+DA, irrigated daily to maintain 45-55% field capacity plus 100  $\mu\text{M}$  dopamine.

| Element | WW                     | DS                     | WW+DA                  | DS+DA                 | Significances |     |                |
|---------|------------------------|------------------------|------------------------|-----------------------|---------------|-----|----------------|
|         |                        |                        |                        |                       | DT            | DA  | DT $\times$ DA |
| N       | 70.38 $\pm$ 3.29c      | 115.95 $\pm$ 3.61b     | 112.44 $\pm$ 7.90b     | 163.15 $\pm$ 4.84a    | ***           | *** | ns             |
| P       | 12.95 $\pm$ 1.12b      | 3.55 $\pm$ 1.37d       | 16.86 $\pm$ 0.65a      | 9.81 $\pm$ 1.34c      | ***           | *** | *              |
| K       | 50.63 $\pm$ 1.74b      | 19.91 $\pm$ 6.80d      | 69.46 $\pm$ 2.01a      | 31.08 $\pm$ 1.72c     | ***           | *** | *              |
| Ca      | 92.70 $\pm$ 1.63a      | 58.92 $\pm$ 3.69b      | 87.01 $\pm$ 1.10a      | 44.20 $\pm$ 4.16c     | ***           | *** | *              |
| Mg      | 16.58 $\pm$ 0.41a      | 10.62 $\pm$ 1.08b      | 16.87 $\pm$ 0.80a      | 7.27 $\pm$ 0.01c      | ***           | **  | **             |
| S       | 4.88 $\pm$ 0.57b       | 7.96 $\pm$ 1.29a       | 9.51 $\pm$ 0.70a       | 3.15 $\pm$ 0.35b      | **            | ns  | ***            |
| Fe      | 930.54 $\pm$ 121.13b   | 1248.03 $\pm$ 380.89b  | 3544.40 $\pm$ 104.96a  | 1437.55 $\pm$ 221.35b | *             | **  | **             |
| Mn      | 157.73 $\pm$ 11.61b    | 237.94 $\pm$ 48.79a    | 218.67 $\pm$ 26.12ab   | 77.26 $\pm$ 2.93c     | ns            | *   | ***            |
| Cu      | 76.42 $\pm$ 5.23b      | 40.91 $\pm$ 0.89c      | 108.54 $\pm$ 5.79a     | 36.86 $\pm$ 3.77c     | ***           | *** | ***            |
| Zn      | 145.21 $\pm$ 3.31b     | 35.61 $\pm$ 5.26c      | 199.64 $\pm$ 10.55a    | 39.83 $\pm$ 9.60c     | ***           | *** | ***            |
| B       | 754.83 $\pm$ 22.95b    | 512.39 $\pm$ 25.86c    | 949.21 $\pm$ 8.39a     | 569.5 $\pm$ 27.18c    | ***           | *** | ***            |
| Al      | 2396.69 $\pm$ 623.91b  | 2679.72 $\pm$ 550.96ab | 3996.04 $\pm$ 234.63a  | 1791.77 $\pm$ 703.62b | *             | ns  | **             |
| Cr      | -10.52 $\pm$ 1.49b     | -13.06 $\pm$ 2.46b     | 15.18 $\pm$ 5.64a      | -5.37 $\pm$ 2.23b     | ***           | *** | **             |
| Ni      | -22.78 $\pm$ 3.13a     | -47.17 $\pm$ 6.11b     | -22.39 $\pm$ 14.10a    | -50.50 $\pm$ 1.92b    | ***           | ns  | ns             |
| As      | 7.41 $\pm$ 0.54ab      | 4.85 $\pm$ 1.06bc      | 9.91 $\pm$ 3.22a       | 0.86 $\pm$ 0.15c      | ***           | ns  | *              |
| Mo      | 4.65 $\pm$ 0.24b       | 15.01 $\pm$ 3.14a      | 14.32 $\pm$ 0.47a      | 4.13 $\pm$ 0.80b      | ns            | ns  | ***            |
| Pb      | -0.81 $\pm$ 0.06b      | 1.63 $\pm$ 1.31a       | 3.25 $\pm$ 0.09a       | -0.84 $\pm$ 0.73b     | ns            | ns  | ***            |
| Cd      | -1783.79 $\pm$ 77.75ab | -1830.66 $\pm$ 233.32b | -1457.60 $\pm$ 111.97a | -2215.97 $\pm$ 68.79c | **            | ns  | **             |

**TABLE S10 | Nutrient resorption proficiency for elements in leaves from plants grown for 120 d under different watering and dopamine treatments.** Data are means  $\pm$ SD (n=5). Unit of measure: mg g<sup>-1</sup> DW for N, P, K, Ca, Mg, and S;  $\mu$ g g<sup>-1</sup> DW for Fe, Mn, Cu, Zn, B, Al, Cr, Ni, As, Mo, Pb, and Cd. An ANOVA test followed by Tukey's multiple range test was performed. Within a row, values not followed by the same letter indicate significant differences at  $P_{0.05}$  level. Significant effects of the main factors drought (DT), dopamine (DA) and the interactions (DT $\times$ DA) are also given in the table: ns, not significant; \*,  $P < 0.05$ ; \*\*,  $P < 0.01$ ; and \*\*\*,  $P < 0.001$ . Treatments: WW, irrigated daily to maintain 75-85% field capacity; DS, irrigated daily to maintain 45-55% field capacity; WW+DA, irrigated daily to maintain 75-85% field capacity plus 100  $\mu$ M dopamine; and DS+DA, irrigated daily to maintain 45-55% field capacity plus 100  $\mu$ M dopamine.

| Element | WW                 | DS                 | WW+DA              | DS+DA             | Significances |     |                |
|---------|--------------------|--------------------|--------------------|-------------------|---------------|-----|----------------|
|         |                    |                    |                    |                   | DT            | DA  | DT $\times$ DA |
| N       | 9.39 $\pm$ 0.16d   | 11.65 $\pm$ 0.25b  | 11.07 $\pm$ 0.14c  | 12.69 $\pm$ 0.10a | ***           | *** | ***            |
| P       | 0.80 $\pm$ 0.01b   | 0.41 $\pm$ 0.02d   | 1.07 $\pm$ 0.07a   | 0.50 $\pm$ 0.01c  | ***           | *** | ***            |
| K       | 10.34 $\pm$ 0.17d  | 10.78 $\pm$ 0.26c  | 13.08 $\pm$ 0.14a  | 11.53 $\pm$ 0.21b | ***           | *** | ***            |
| Ca      | 27.00 $\pm$ 0.33a  | 21.40 $\pm$ 1.17c  | 20.52 $\pm$ 0.53c  | 23.24 $\pm$ 0.64b | ***           | *** | ***            |
| Mg      | 3.75 $\pm$ 0.09b   | 3.81 $\pm$ 0.29ab  | 3.64 $\pm$ 0.05b   | 4.11 $\pm$ 0.05a  | **            | ns  | *              |
| S       | 0.80 $\pm$ 0.07ab  | 0.70 $\pm$ 0.06b   | 0.86 $\pm$ 0.07a   | 0.83 $\pm$ 0.04a  | *             | **  | ns             |
| Fe      | 116.14 $\pm$ 7.77a | 69.86 $\pm$ 6.68c  | 89.31 $\pm$ 4.36b  | 97.25 $\pm$ 3.41b | ***           | ns  | ***            |
| Mn      | 16.16 $\pm$ 1.99c  | 24.63 $\pm$ 3.56ab | 20.79 $\pm$ 1.28bc | 26.23 $\pm$ 2.26a | ***           | *   | ns             |
| Cu      | 3.63 $\pm$ 0.36b   | 2.03 $\pm$ 0.08c   | 3.90 $\pm$ 0.26a   | 2.73 $\pm$ 0.25c  | ***           | **  | ns             |
| Zn      | 30.79 $\pm$ 3.38a  | 17.20 $\pm$ 0.34c  | 31.71 $\pm$ 2.91a  | 25.79 $\pm$ 2.54b | ***           | **  | **             |
| B       | 28.18 $\pm$ 2.68a  | 21.99 $\pm$ 0.73b  | 31.63 $\pm$ 2.52a  | 28.91 $\pm$ 2.43a | ***           | *** | ns             |
| Al      | 102.98 $\pm$ 6.02a | 56.37 $\pm$ 7.18c  | 79.58 $\pm$ 3.84b  | 82.33 $\pm$ 7.39b | ***           | ns  | ***            |
| Cr      | 0.50 $\pm$ 0.03a   | 0.35 $\pm$ 0.05b   | 0.48 $\pm$ 0.07a   | 0.41 $\pm$ 0.04ab | ***           | ns  | ns             |
| Ni      | 0.54 $\pm$ 0.06ab  | 0.49 $\pm$ 0.04b   | 0.54 $\pm$ 0.06b   | 0.65 $\pm$ 0.07a  | ns            | **  | **             |
| As      | 1.26 $\pm$ 0.05a   | 1.01 $\pm$ 0.10b   | 1.13 $\pm$ 0.06ab  | 1.08 $\pm$ 0.06b  | ***           | ns  | **             |
| Mo      | 0.39 $\pm$ 0.04b   | 0.35 $\pm$ 0.03b   | 0.48 $\pm$ 0.06a   | 0.39 $\pm$ 0.04b  | **            | **  | ns             |
| Pb      | 0.66 $\pm$ 0.04a   | 0.43 $\pm$ 0.03c   | 0.65 $\pm$ 0.03a   | 0.53 $\pm$ 0.01b  | ***           | **  | ***            |
| Cd      | 49.11 $\pm$ 3.61a  | 33.26 $\pm$ 2.84b  | 45.98 $\pm$ 4.51a  | 36.71 $\pm$ 2.63b | ***           | ns  | ns             |

**TABLE S11 | Concentration of nutritional elements in leaf, stem, and root dry matter from plants grown for 0 d under different watering and dopamine treatments.** Data are means  $\pm$ SD (n=5). Unit of measure: mg g<sup>-1</sup> DW for N, P, K, Ca, Mg, and S;  $\mu$ g g<sup>-1</sup> DW for Fe, Mn, Cu, Zn, B, Al, Cr, Ni, As, Mo, Pb, and Cd.

| Element | Leaf             | Stem             | Root               |
|---------|------------------|------------------|--------------------|
| N       | 29.29 $\pm$ 0.15 | 13.10 $\pm$ 0.21 | 13.32 $\pm$ 0.14   |
| P       | 2.00 $\pm$ 0.12  | 1.06 $\pm$ 0.06  | 1.07 $\pm$ 0.11    |
| K       | 13.79 $\pm$ 0.20 | 6.00 $\pm$ 0.18  | 5.01 $\pm$ 0.11    |
| Ca      | 16.56 $\pm$ 0.42 | 8.94 $\pm$ 0.71  | 7.85 $\pm$ 0.69    |
| Mg      | 4.14 $\pm$ 0.34  | 1.67 $\pm$ 0.07  | 1.78 $\pm$ 0.12    |
| S       | 1.62 $\pm$ 0.09  | 0.46 $\pm$ 0.03  | 1.09 $\pm$ 0.11    |
| Fe      | 84.38 $\pm$ 2.25 | 68.51 $\pm$ 4.97 | 800.24 $\pm$ 60.73 |
| Mn      | 26.62 $\pm$ 1.30 | 8.43 $\pm$ 0.51  | 21.63 $\pm$ 0.86   |
| Cu      | 2.94 $\pm$ 0.38  | 3.11 $\pm$ 0.48  | 9.28 $\pm$ 0.43    |
| Zn      | 9.58 $\pm$ 0.39  | 9.36 $\pm$ 0.48  | 11.64 $\pm$ 0.76   |
| B       | 45.50 $\pm$ 1.28 | 30.33 $\pm$ 0.57 | 33.16 $\pm$ 1.73   |
| Al      | 56.01 $\pm$ 1.81 | 13.94 $\pm$ 0.72 | 807.91 $\pm$ 43.00 |
| Cr      | 1.30 $\pm$ 0.16  | 0.81 $\pm$ 0.06  | 7.85 $\pm$ 0.64    |
| Ni      | 1.52 $\pm$ 0.16  | 10.75 $\pm$ 0.31 | 12.51 $\pm$ 0.68   |
| As      | 0.55 $\pm$ 0.04  | 0.12 $\pm$ 0.02  | 1.08 $\pm$ 0.12    |
| Mo      | 1.11 $\pm$ 0.07  | 0.37 $\pm$ 0.04  | 2.05 $\pm$ 0.17    |
| Pb      | 0.19 $\pm$ 0.02  | 0.18 $\pm$ 0.02  | 1.38 $\pm$ 0.10    |
| Cd      | 17.60 $\pm$ 0.42 | 40.98 $\pm$ 4.71 | 487.56 $\pm$ 35.30 |
